# Supplementary material
Source: Springer Nature journal article supplement (https://www.springermedizin.de/resource/supplementary/12936_2008_654_MOESM2_ESM.pdf/9547926)
Supplement: MOESM2 [file 9547926]

Day 0

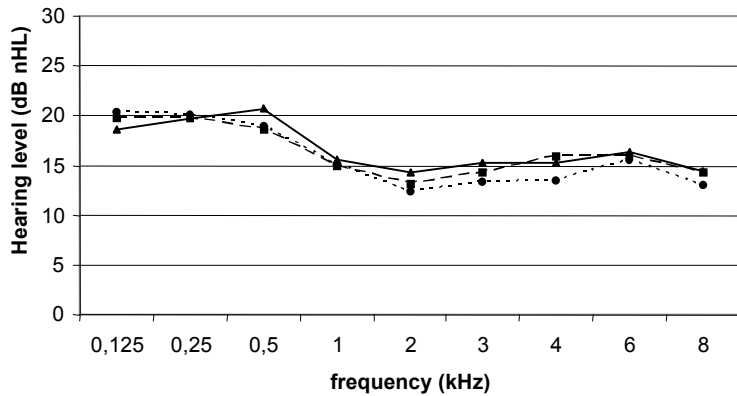

---●--- Quinine ---■--- Atovaquone-proguanil —▲— Artemether-lumefantrine

Day 7

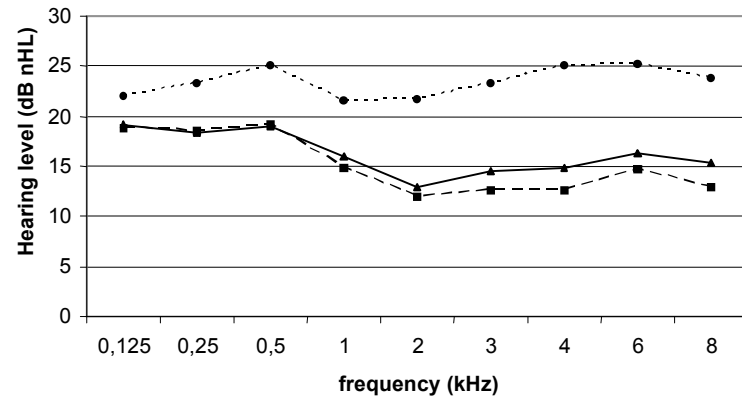

---●--- Quinine ---■--- Atovaquone-proguanil —▲— Artemether-lumefantrine

Day 28

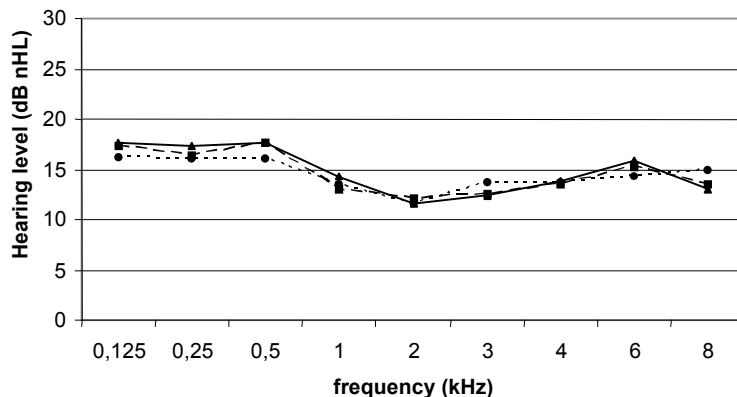

---●--- Quinine ---■--- Atovaquone-proguanil —▲— Artemether-lumefantrine

Day 90

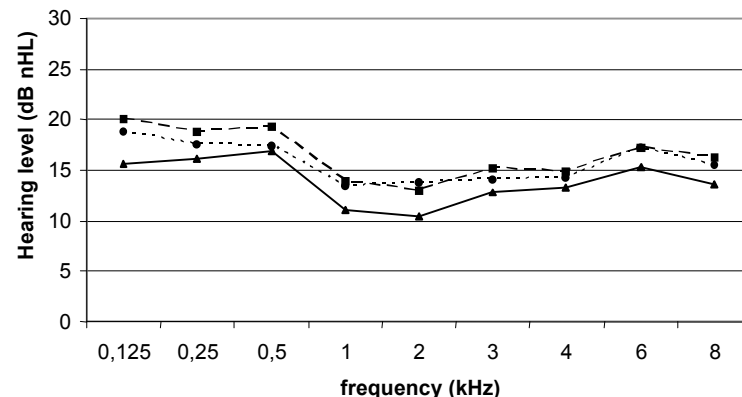

---●--- Quinine ---■--- Atovaquone-proguanil —▲— Artemether-lumefantrine
